# Supplementary material
Source: PubMed Central journal article supplement (PMC2930020)
Supplement: NIHMS229293-supplement-Supplementary_Inforamtion.pdf [file NIHMS229293-supplement-Supplementary_Inforamtion.pdf]

# Antiproliferative Triterpenoid Saponins of *Dodonaea viscosa* from the Madagascar Dry Forest

Shugeng Cao, Peggy Brodie, Martin Callmander, Richard Randrianaivo, Jeremi Razafitsalama,  
Etienne Rakotobe, Vincent E. Rasamison, Karen TenDyke, Yongchun Shen, Edward M. Suh, and  
David G. I. Kingston

## **Supporting Information**

<sup>1</sup>H NMR Spectrum of dodoneaside A (Compound **1**) in CD<sub>3</sub>OD

<sup>1</sup>H NMR Spectrum of dodoneaside B (Compound **2**) in CD<sub>3</sub>OD

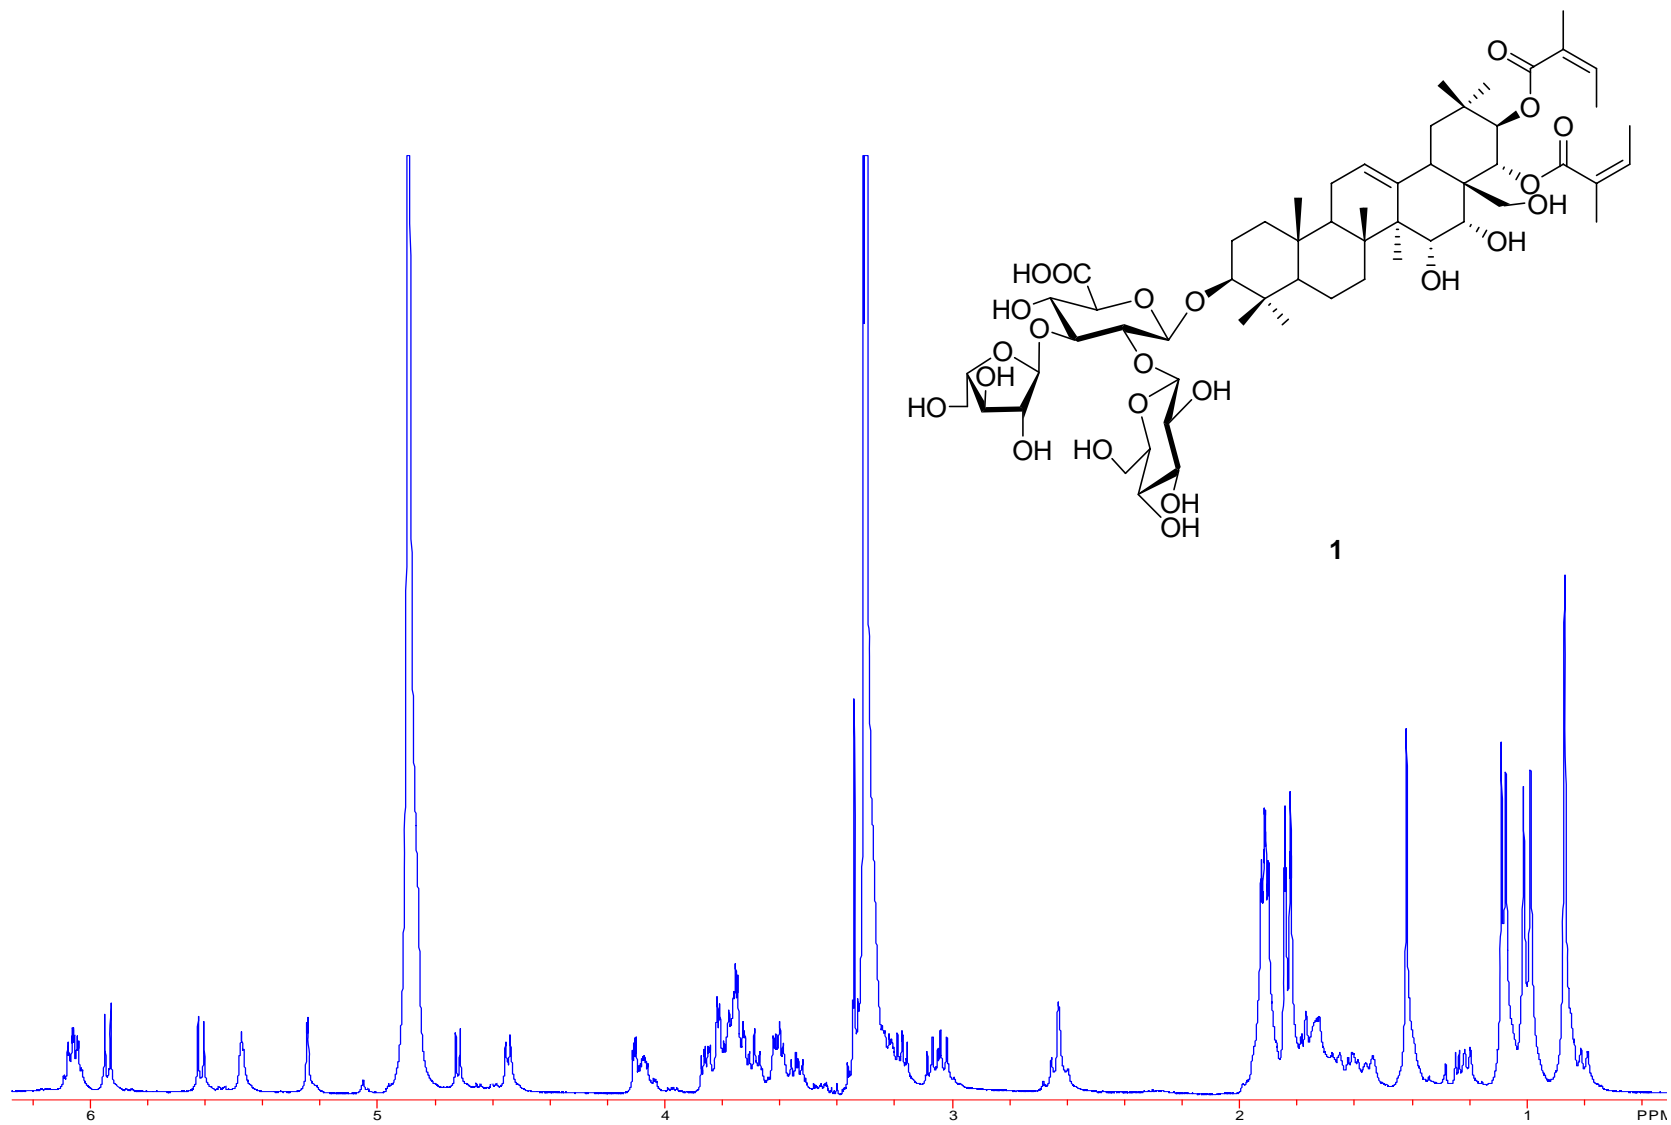

<sup>1</sup>H NMR spectrum of compound 1

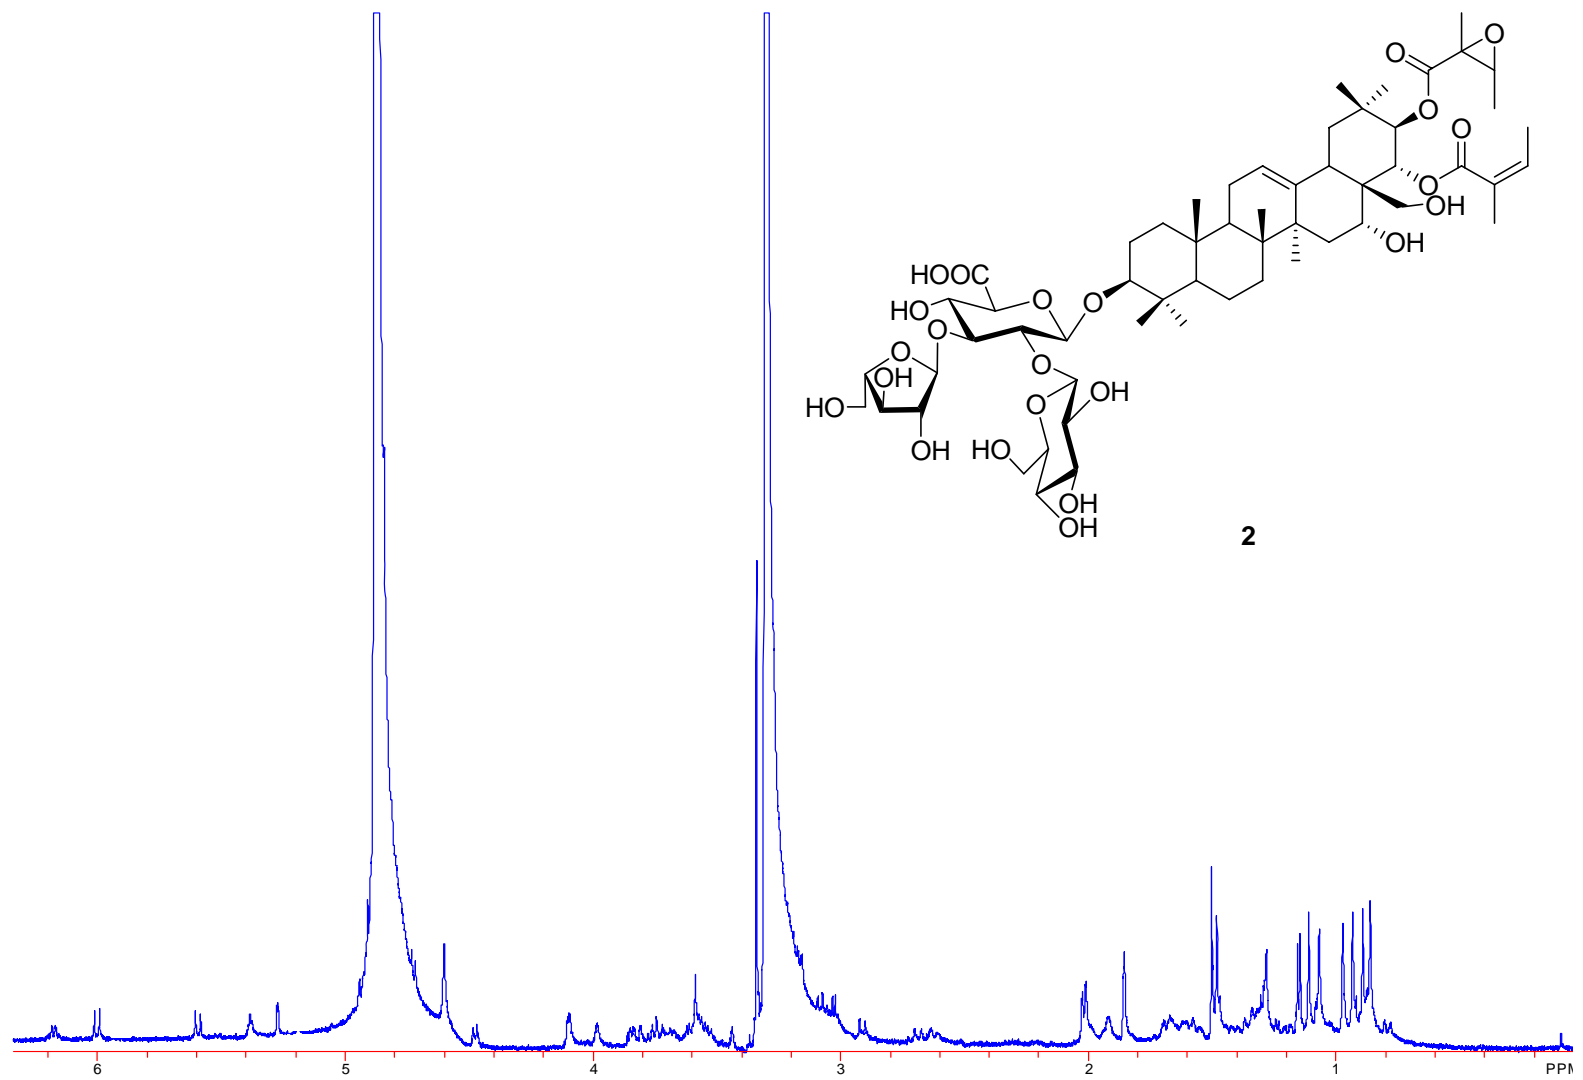

<sup>1</sup>H NMR spectrum of compound **2**
